# Supplementary material for: Surface-enhanced Raman scattering enhancement using a hybrid gold nanoparticles@carbon nanodot substrate for herbicide detection
Source: Royal Society of Chemistry journal article supplement (doi:10.1039/d4an00649f), 2024-01-01
Supplement: d4an00649f1.pdf [file d4an00649f1.pdf]

## Supplemental Information for

# Surface-enhanced Raman scattering enhancement using a hybrid gold nanoparticles@carbon nanodots substrate for herbicide detection

*Naghmeh Aboualigaedari<sup>1</sup>, Anitha Jayapalan<sup>1</sup>, Panesun Tukur<sup>1</sup>, Mengxin Liu<sup>1</sup>, Frank Tukur<sup>1</sup>, Yanling Zhang<sup>3</sup>, Gerald Ducatte<sup>3</sup>, Madan Verma<sup>3</sup>, Janet Tarus<sup>3</sup>, Simona E. Hunyadi Murph<sup>2\*</sup>, and Jianjun Wei<sup>1\*</sup>*

<sup>1</sup>Department of Nanoscience, Joint School of Nanoscience and Nanoengineering, University of North Carolina at Greensboro, Greensboro, NC 27401, United State.

<sup>2</sup> Environmental and Legacy Management Department, Savannah River National Laboratory (SRNL), Aiken, SC, US 29808

<sup>3</sup>Syngenta Crop protection Inc. Greensboro, NC 27409, USA

\*Corresponding Authors

JW: [j\\_wei@uncg.edu](mailto:j_wei@uncg.edu), SEHM: [Simona.Murph@srl.doe.gov](mailto:Simona.Murph@srl.doe.gov)

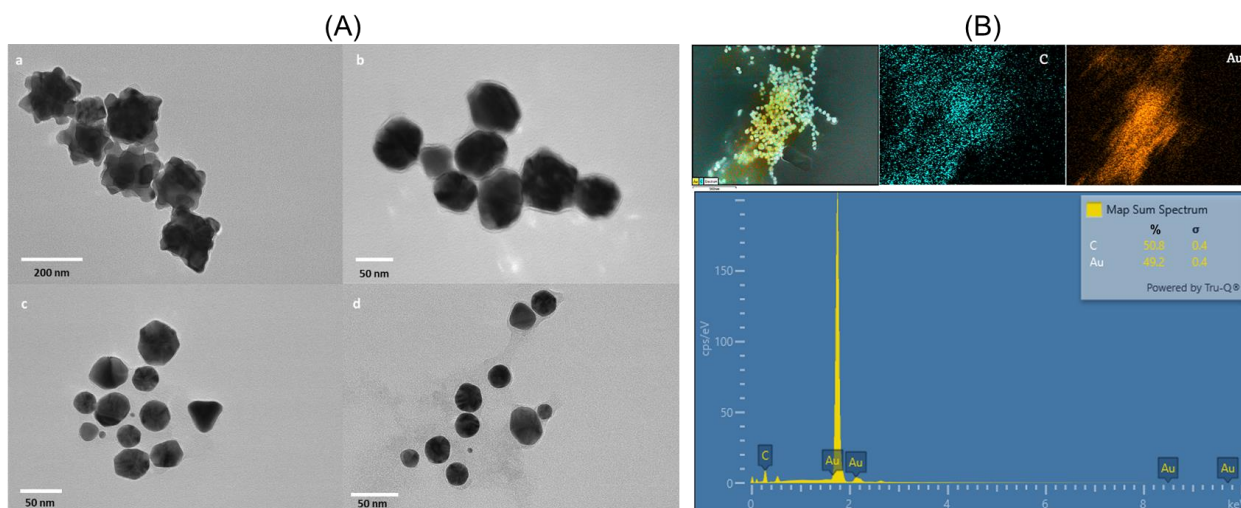

**Figure S1.** (A). TEM images of AuNPs@CNDs at different HAuCl<sub>4</sub> volume from 70-190  $\mu$ L (HAuCl<sub>4</sub>/CNDs mass ratio of 5.2, 3.3, 2.4, and 1.9 from (a) to (d), respectively). (B). SEM image and SEM-EDS giving the element mapping of the AuNPs@CNDs.

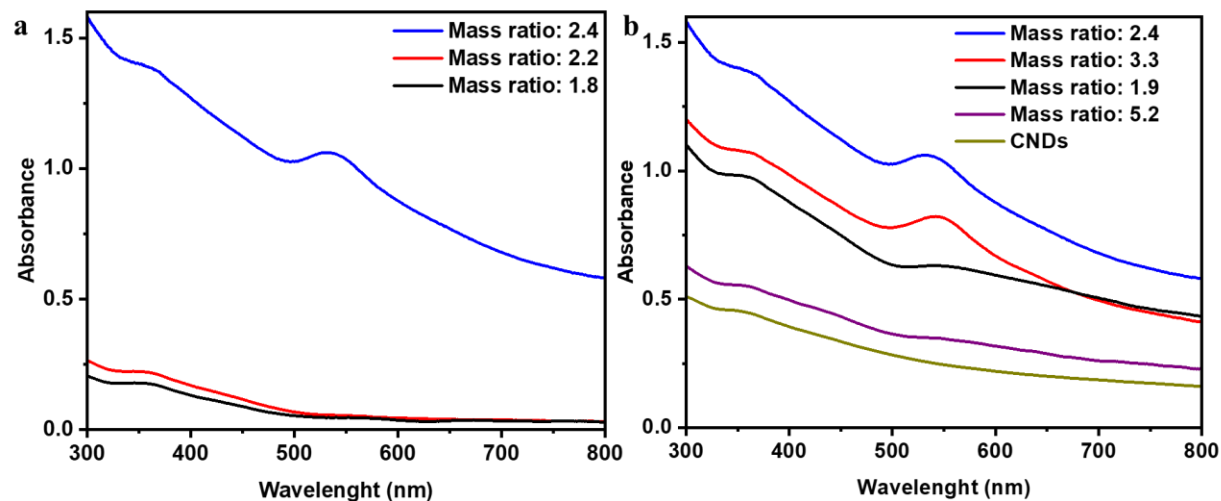

**Figure S2.** UV-vis spectra of AuNPs@CNDs (concentration of CNDs was 0.09, 0.11, and 0.12 mg mL<sup>-1</sup> while concentration of HAuCl<sub>4</sub> was 1 mg mL<sup>-1</sup>) (a). UV-vis spectra of AuNPs@CNDs with different mass ratio of HAuCl<sub>4</sub>/CNDs from 5.2-1.9 while the volume of HAuCl<sub>4</sub> was 70, 110, 150, and 190  $\mu$ L and concentration of CNDs was 0.12 mg mL<sup>-1</sup> (b).

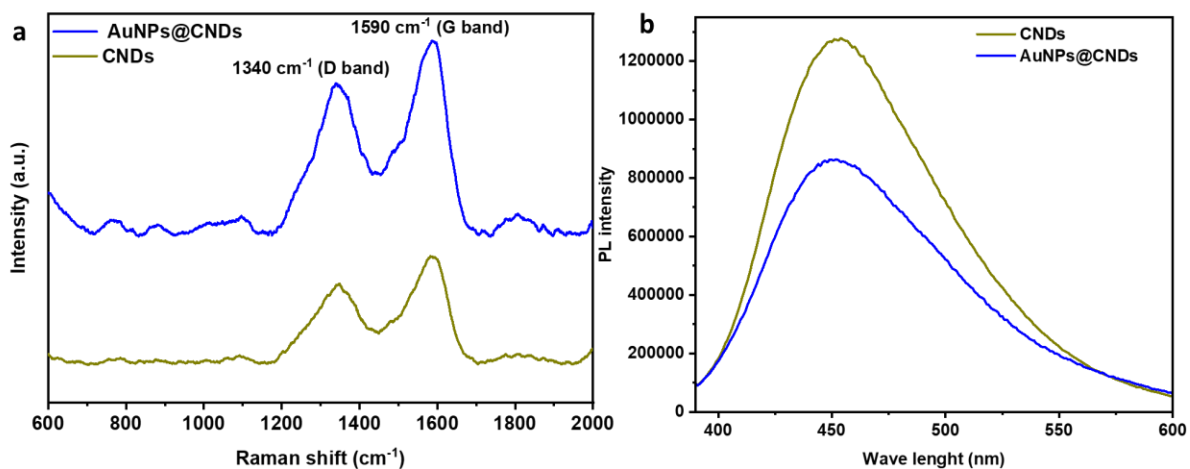

**Figure S3.** Raman spectra of AuNPs@CNDs and CNDs (a). PL spectra of AuNPs@CNDs and CNDs aqueous suspension excited at 380 nm (b).

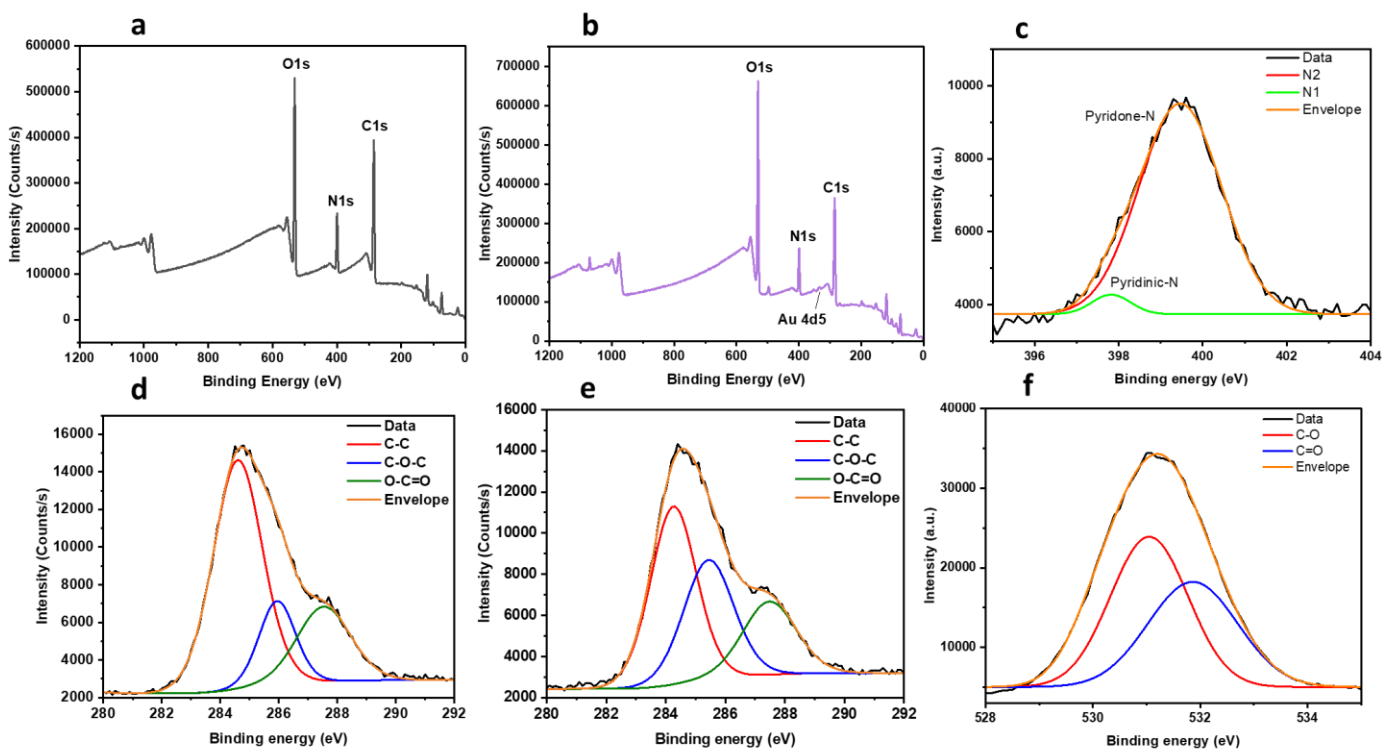

**Figure S4.** Full-scan XPS spectra of CNDs (a) and AuNPs@CNDs (b); The N1s XPS spectra of AuNPs@CNDs (c); The C1s XPS spectra of CNDs (d) and AuNPs@CNDs (e); The O1s XPS spectra of AuNPs@CNDs (f).

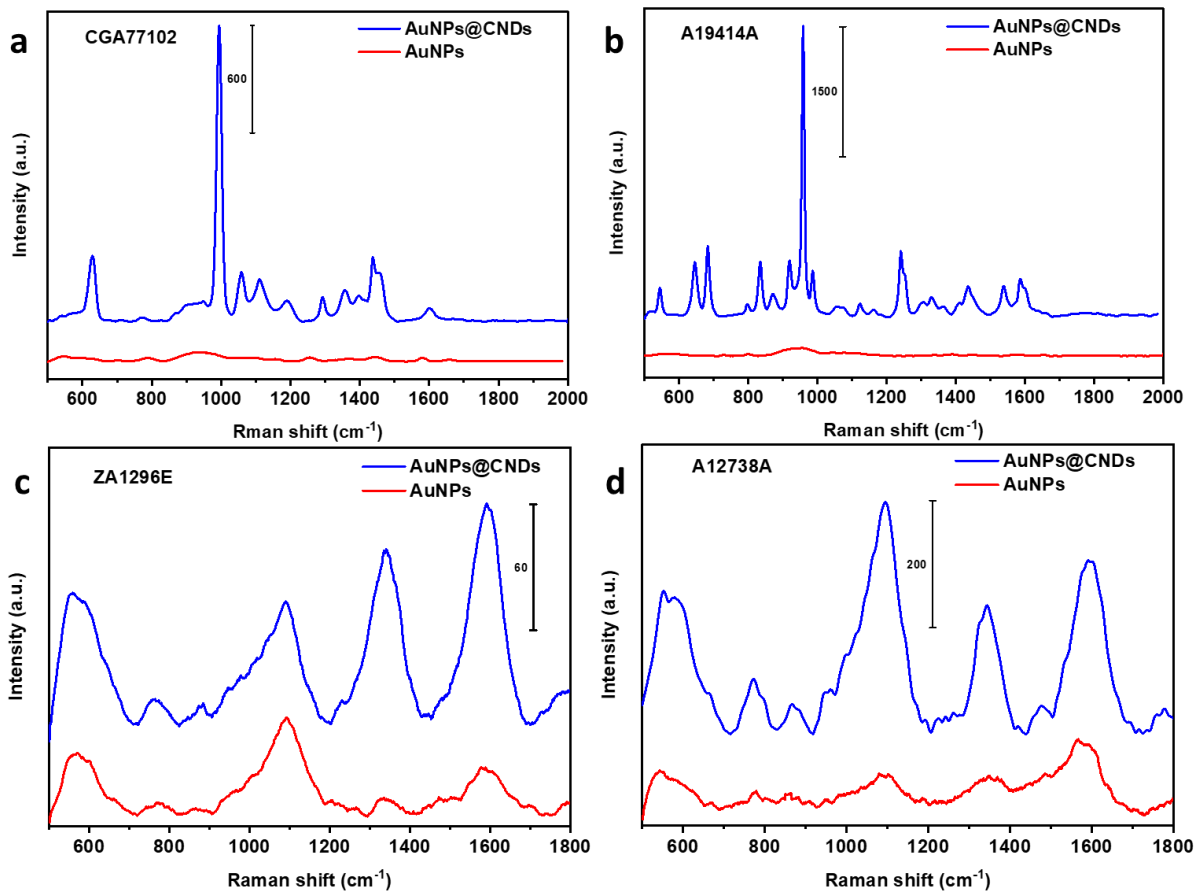

**Figure S5.** SERS spectra of (a)  $10^{-3}$  M CGA77102, (b) A19414A, (c)  $10^{-3}$  M ZA1296E, and (d)  $10^{-3}$  M A12738A using AuNPs@CNDs and AuNPs, respectively, which show the largely increased Raman signal using AuNPs@CNDs as probes in sensing.

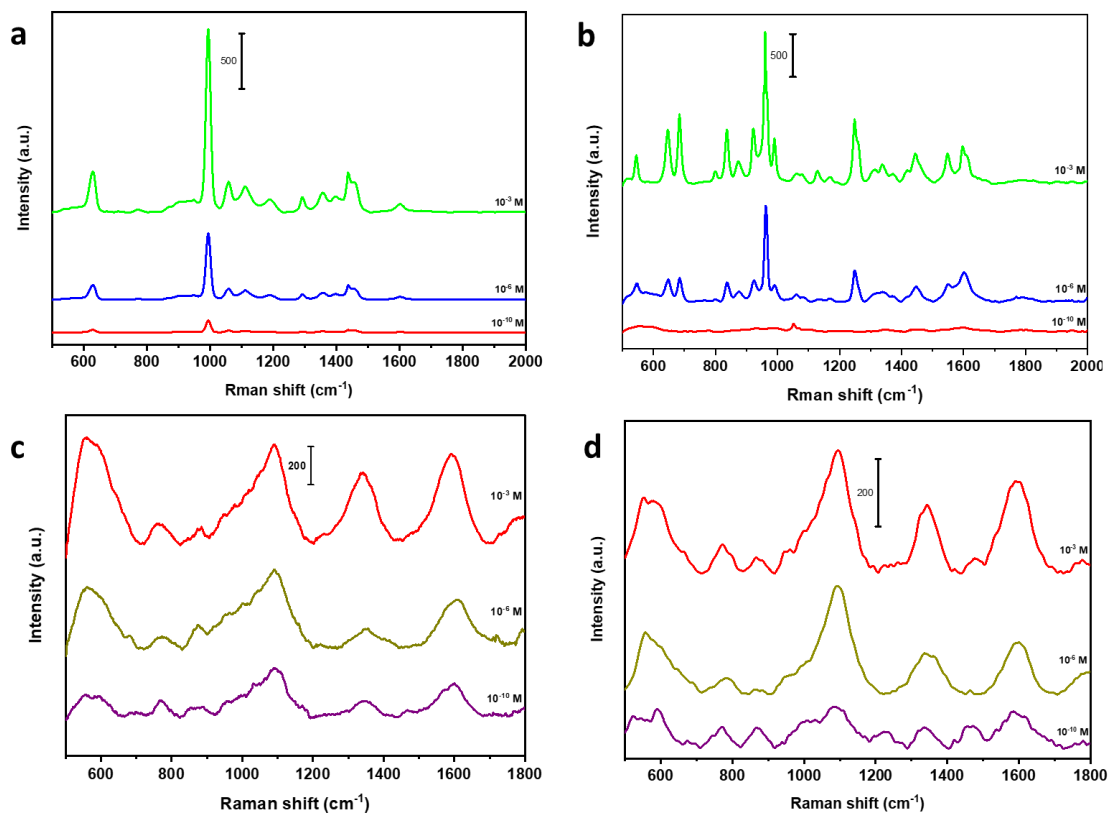

**Figure S6.** SERS spectra of spiked samples at three different concentrations  $10^{-10}$ ,  $10^{-6}$  and  $10^{-3}$  M for (a) CGA77102, (b) A19414A, (c) ZA1296E, and (d) A12738A using AuNPs@CNDs for SERS detection.
